# Supplementary material for: Aluminosilicate-Supported Catalysts for the Synthesis of Cyclic Carbonates by Reaction of CO2 with the Corresponding Epoxides
Source: MDPI journal article supplement (doi:10.3390/molecules27248883), 2022-12-14
Supplement: s1 [file s1]

# Aluminosilicate-Supported Catalysts for the Synthesis of Cyclic Carbonates by Reaction of CO<sub>2</sub> with the Corresponding Epoxides

Luciano Atzori <sup>1,†</sup>, Adrien Comès <sup>2,†</sup>, Luca Fusaro <sup>2</sup>, Carmela Aprile <sup>2,\*</sup> and Maria Giorgia Cutrufello <sup>1,3,\*</sup>

<sup>1</sup> Dipartimento di Scienze Chimiche e Geologiche, Università di Cagliari, 09042 Monserrato, Italy; lucianoatzori@hotmail.it

<sup>2</sup> Unit of Nanomaterial Chemistry, Department of Chemistry, University of Namur, 5000 Namur, Belgium

<sup>3</sup> Consorzio Interuniversitario Nazionale per la Scienza e Tecnologia dei Materiali (INSTM), Unità di Cagliari, 50121 Firenze, Italy

\* Correspondence: carmela.aprile@unamur.be (C.A.); gcutrufe@unica.it (M.G.C.)

† These authors contributed equally to this work.

## Supplementary Materials

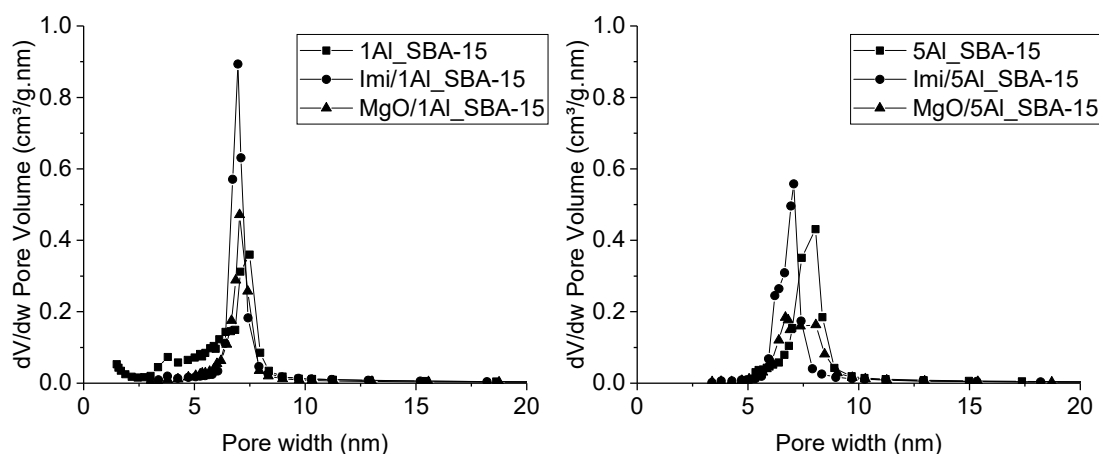

**Figure S1.** Pore size distribution for the  $x$ Al\_SBA-15 supports and the Imi/ $x$ Al\_SBA-15 and MgO/ $x$ Al\_SBA-15 catalysts.

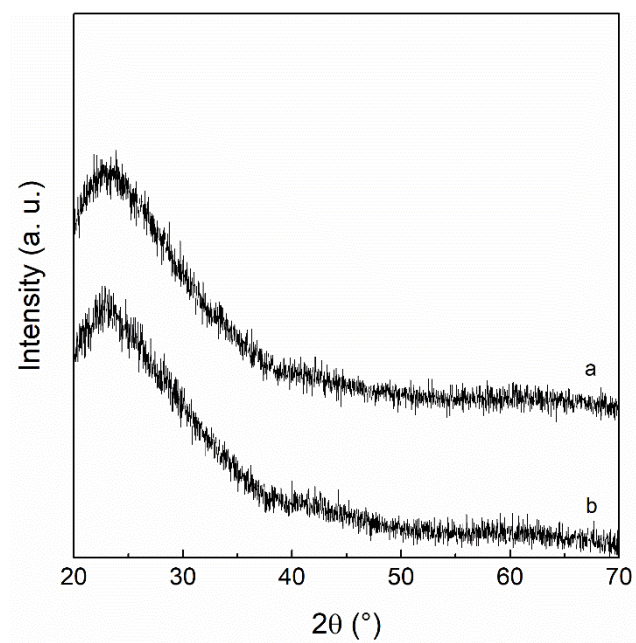

**Figure S2.** Wide-angle XRD patterns of MgO/1Al\_SBA-15 (a) and MgO/5Al\_SBA-15 (b).
